1 **The genetic basis of host choice and resting behavior**  
2 **in the major African malaria vector, *Anopheles***  
3 ***arabiensis***

4  
5 **Bradley J Main<sup>1\*</sup>, Yoosook Lee<sup>1</sup>, Heather M Ferguson<sup>2</sup>, Katharina S Kreppel<sup>2,3</sup>, Anicet**  
6 **Kihonda<sup>3</sup>, Nicodem J Govella<sup>3</sup>, Travis C Collier<sup>1</sup>, Anthony J Cornel<sup>4</sup>, Eleazar Eskin<sup>5</sup>, Eun**  
7 **Yong Kang<sup>5</sup>, Catelyn C Nieman<sup>1</sup>, Allison M Weakley<sup>1</sup> and Gregory C Lanzaro<sup>1</sup>**

8  
9 **\*Correspondence: [bradmain@gmail.com](mailto:bradmain@gmail.com)**

10  
11 **<sup>1</sup>Vector Genetics Laboratory, Department of Pathology, Microbiology and**  
12 **Immunology/University of California, Davis, 95616, USA**

13  
14 **<sup>2</sup>Institute of Biodiversity, Animal Health and Comparative Medicine, University of**  
15 **Glasgow, Glasgow, UK**

16  
17 **<sup>3</sup>Environmental Health and Ecological Sciences group, Ifakara Health Institute, Ifakara,**  
18 **United Republic of Tanzania.**

19  
20 **<sup>4</sup>Department of Entomology and Nematology/University of California, Davis, 95616, USA.**

21  
22 **<sup>5</sup>Department of Computer Science, University of California Los Angeles, 90095 Los**  
23 **Angeles, USA.**

24  
25 **Keywords: *Anopheles arabiensis*, host-preference, resting behavior, association study,**  
26 **population genetics, chromosome inversion.**

27  
28 **Abstract**

29 Malaria transmission is dependent on the propensity of *Anopheles* mosquitoes to bite  
30 humans (anthropophily) instead of other dead end hosts. Recent increases in the usage  
31 of Long Lasting Insecticide Treated Nets (LLINs) in Africa have been associated with  
32 reductions in highly anthropophilic vectors such as *Anopheles gambiae* s.s., leaving  
33 less anthropophilic species such as *Anopheles arabiensis* as the most prominent  
34 remaining source of transmission in many settings. *An. arabiensis* is more of a

35 generalist in terms of its host choice and resting behavior, which may be due to  
36 phenotypic plasticity and/or segregating allelic variation. To investigate the potential  
37 genetic basis of host choice and resting behavior in *An. arabiensis* we performed a  
38 genome-wide association study on host choice (human- or cattle-fed) and resting  
39 position (collected indoors or outdoors) in the Kilombero Valley, Tanzania. This  
40 represents the first genomic/molecular analysis of host choice and resting behavior in a  
41 malaria vector. We identified a total of 4,820,851 SNPs, which were used to conduct the  
42 first genome-wide estimates of “SNP heritability” for host choice and resting behavior in  
43 this species. A genetic component was detected for host choice (human vs cow fed;  
44 permuted  $P = 0.002$ ), but there was no evidence of a genetic component for resting  
45 behavior (indoors versus outside; permuted  $P = 0.465$ ). A principal component analysis  
46 (PCA) segregated individuals based on genomic variation into three groups which are  
47 characterized by differences at the 2Rb and/or 3Ra paracentromeric chromosome  
48 inversions. There was a non-random distribution of cattle-fed mosquitoes between the  
49 PCA clusters, suggesting that alleles linked to the 2Rb and/or 3Ra inversions may  
50 influence host choice. Using a novel inversion genotyping assay, we detected a  
51 significant enrichment of the standard arrangement (non-inverted) of 3Ra among cattle-  
52 fed mosquitoes (N=129) versus all non-cattle-fed individuals (N=234;  $\chi^2$ ,  $p=0.007$ ).  
53 Thus, tracking the frequency of the 3Ra in *An. arabiensis* populations is important,  
54 especially in relation to the emergence of behavioral avoidance (e.g. shifting toward  
55 cattle-feeding) in some populations. A better understanding of the genetic basis for host  
56 choice in *An. arabiensis* may also open avenues for novel vector control strategies  
57 based on introducing genes for zoophily into wild mosquito populations.

58

## 59 **Author summary**

60 Malaria transmission is driven by the propensity for mosquito vectors to bite people,  
61 whilst its control depends on the tendency of mosquitoes to bite and rest in places  
62 where they will come into contact with insecticides. In many parts of Africa, *Anopheles*

63 *arabiensis* is now the only remaining vector in areas where coverage with Long Lasting  
64 Insecticide Treated Nets is high. We sought to assess the potential for *An. arabiensis* to  
65 adapt its behavior to avoid control measures by investigating the genetic basis for its  
66 host choice and resting behavior. Blood fed *An. arabiensis* were collected resting  
67 indoors and outdoors in the Kilombero Valley, Tanzania. We sequenced a total of 48  
68 genomes representing 4 phenotypes (human or cow fed, resting in or outdoors) and  
69 tested for a genetic basis for each phenotype. Genomic analysis followed up by  
70 application of a novel molecular karyotyping assay revealed a relationship between *An.*  
71 *arabiensis* that fed on cattle and the standard arrangement of the 3Ra inversion. This  
72 indicates that the host choice behavior of *An. arabiensis* has has a substantial genetic  
73 component. Validation with controlled host preference assays comparing individuals  
74 with the standard and inverted arrangement of 3Ra is still needed.

75

## 76 **Introduction**

77 Blood-feeding insects impose a substantial burden on human and animal health through  
78 their role as disease vectors. In particular, mosquito species that feed on human blood  
79 pose an enormous public health threat by transmitting numerous pathogens such as  
80 dengue virus, Zika virus and malaria, which together kill more than one million people  
81 per year [1,2]. Human exposure to pathogens transmitted by mosquito vectors is  
82 determined by vector behaviors such as: (1) propensity to feed on humans relative to  
83 other animals (anthropophily) and (2) preference for living in close proximity to humans,  
84 as reflected by biting and resting inside houses (endophily) [3]. These traits are known  
85 to vary within and between the *Anopheles* mosquito species that transmit malaria [3]. It  
86 has been demonstrated since the earliest days of malaria transmission modeling [4] that  
87 the degree of anthropophily in vector populations is strongly associated with  
88 transmission intensity. Furthermore, the extent to which vectors feed and rest inside  
89 houses is a critical determinant of the effectiveness of current frontline control strategies

90 including Long-Lasting Insecticide Treated Nets (LLINs) and Indoor Residual Spraying  
91 (IRS) which selectively kill mosquitoes that bite and rest indoors [1].

92

93 Vector species that are more generalist with respect to host feeding behavior, like *An.*  
94 *arabiensis*, are thought to be better able to persist in areas of high indoor insecticide  
95 use. This is because they are more likely to avoid feeding and resting in areas protected  
96 by insecticides. For example, several studies in East Africa have shown dramatic  
97 declines in the abundance of the highly anthropophilic species *An. gambiae* s.s. relative  
98 to *An. arabiensis* in parallel with the use of LLINs [5–13]. Similar changes in vector  
99 species composition in response to LLINs have been reported outside of Africa,  
100 including in the Solomon Islands where the highly endophagic, anthropophilic *An.*  
101 *punctulatus* has been nearly eliminated by LLINs whereas the more exophilic *An. farauti*  
102 remains [14]. Given the importance of mosquito feeding and resting behavior to the  
103 effectiveness of disease control and transmission, there is an urgent need to  
104 understand the underlying biological determinants of these behaviors and their impact  
105 (short and long term) on the effectiveness of the existing frontline interventions.

106

107 Environmental heterogeneity has been shown to have a substantial influence on several  
108 important vector behaviors [15], including host choice and resting behavior [3]. For  
109 example, a recent study in southern Tanzania reported that the proportion of blood  
110 meals taken from humans by *An. arabiensis* fell by over 50% when at least one cow is  
111 kept at a household [16]. The resting behavior of mosquito vectors in this study was  
112 also highly associated with proximity to livestock; the proportion of *An. arabiensis*  
113 resting indoors fell by ~50% when cattle were present at the household [16]. Whilst  
114 these studies confirm that the environment can influence malaria vector behavior, far  
115 less is known about the influence of mosquito genetics on these behavioral phenotypes.  
116 An early study by Gillies [17] experimentally investigated the potential heritability of host  
117 choice behavior in *An. gambiae* s.l., and showed these vectors significantly increased

118 their preference for cattle hosts (relative to humans) within a few generations of  
119 selection. Other early work demonstrated an association between the 3Ra  
120 chromosomal inversion and *An. Arabiensis* found in cattle-sheds [18], and between the  
121 2Rb chromosomal inversion and human-feeding [19]. Understanding the genetic basis  
122 for host choice behavior is essential for elucidation of the co-evolutionary forces that  
123 stabilize the transmission of vector-borne diseases, and may enable the development of  
124 genetic markers that could be used for rapid quantification of the degree of  
125 anthropophily in vector populations as required to estimate transmission risk and plan  
126 vector control programs [20].

127  
128 There is evidence from other mosquito taxa that host feeding behavior has a significant  
129 genetic component. For example, a recent study linked allelic variation in the odorant  
130 receptor gene *Or4* to human-biting preference in the dengue mosquito vector *Aedes*  
131 *aegypti* [21]. However, to date, no ortholog for *AegOr4* has been identified in  
132 Anopheline mosquitoes [22], and no direct functional links between genetic mutations in  
133 African malaria vectors and behaviors that influence transmission potential have been  
134 identified [3,23–25]. As the genera *Aedes* and *Anopheles* diverged before the  
135 emergence of humans (~150MYA) [26], anthropophily likely evolved independently in  
136 these species and may involve distinct mechanisms. Developing the ability to track and  
137 anticipate shifts in mosquito behaviors such as biting time [27], anthropophily [3], and  
138 resting behavior [28] will help improve vector surveillance and anticipation of whether  
139 the effectiveness of control measures are being eroded by mosquito behavioral  
140 adaptations [29]. Such mosquito behavioral shifts that reduce their contact with  
141 interventions, termed behavioral avoidance, may be a significant threat to the long-term  
142 goal of malaria elimination [30]. Understanding the genetic contribution to these  
143 phenotypes is a critical first step toward effective mosquito control in the future.

144

145 Due to the role of *An. arabiensis* in maintaining residual malaria transmission across  
146 much of sub-Saharan Africa [8,13,31], we conducted a comprehensive investigation of  
147 the genetic basis of host choice and resting habitat choice in this phenotypically variable  
148 species. This included the first application of both whole genome sequencing and a  
149 population-scale assessment of chromosome inversion frequencies to test for  
150 associations between mosquito behavioral phenotypes and genotype. Our aim was to  
151 elucidate genetic factors that are associated with mosquito behaviors, and compare  
152 potential candidate genes with other important disease vector species such as *Ae.*  
153 *aegypti*, whose preference for humans has been recently described at the genetic level  
154 [21]. Additionally, we hope information gathered here can be of use to future malaria  
155 control scenarios by highlighting the potential of *An. arabiensis* to evolve behavioral  
156 avoidance strategies that could either decrease transmission (e.g. zoophily) or diminish  
157 control effectiveness (e.g. outdoor resting).

158

## 159 **Results**

### 160 **Analysis of host choice**

161 We analyzed the blood meal from 1,731 *An. arabiensis* females that were captured  
162 resting indoors or outdoors from 3 villages in Tanzania. Specific hosts were identified  
163 using a multiplex genotyping assay performed on DNA extracted from female  
164 abdomens (see methods). The relative frequencies of blood meals from a given host  
165 varied by site, but cattle was the most abundant blood source detected in all three sites.  
166 Lupiro had a significantly higher proportion of human-fed mosquitoes (24%;  $P < 0.0001$ ,  
167 Fisher exact) than Minepa (7%) and Sagamaganga (11%; Figure 1). Mosquitoes that  
168 tested positive for more than one host were rare (<5%; Figure 1). To investigate  
169 temporal and spatial variation of host choice, mosquitoes were collected from several  
170 households throughout a period of 2 years (Table S9). A backward model selection  
171 approach with Generalized Linear Mixed Models (GLMMs) was used to investigate  
172 whether host choice was impacted by different environmental factors. Livestock

173 presence at the household level (yes or no), season (dry or wet), village and trapping  
174 location (in or out) were included into a maximum model as fixed effects while collection  
175 date and household were added as random effects (Table S10). The final model  
176 showed that livestock presence at the household level and trapping location (indoor or  
177 outdoor) were associated with the frequency of human fed mosquitoes found. The  
178 proportion of human fed *An. arabiensis* varied by household and was inversely  
179 correlated with the presence of livestock ( $P < 0.0001$ , Coeff = -1.92; GLMM, Table S11).  
180 The frequency of human fed mosquitoes was also correlated with trapping location –  
181 less human fed mosquitoes were collected in outdoor traps ( $P = 0.0083$ , Coeff = -0.7349;  
182 GLMM, Table S11).

183

#### 184 **Testing for a genetic component underlying host choice and indoor resting** 185 **behavior**

186 To elucidate a genetic component to host choice and resting behavior, we sequenced a  
187 total of 48 individual *An. arabiensis* genomes (median coverage = 18x; Table S2). In  
188 terms of host choice, this collection included 25 cattle-fed and 23 human-fed individuals  
189 from both indoor (N=24) and outdoor (N=24) resting sites. From these genomes, we  
190 identified a set of 4,820,851 segregating SNPs after a minor allele frequency threshold  
191 of 10% was imposed. Using these data, we estimated the genetic component (or “SNP  
192 heritability” [32]) for each phenotype (see methods). The sample size of 48 genomes  
193 was not sufficient to estimate SNP heritability with high confidence. For example, the  
194 heritability estimate for human-fed vs. cattle-fed mosquitoes was  $H^2 = 0.94$ , SE = 3.47  
195 and indoor vs. outdoor was  $H^2 = 0.05$ , SE = 2.34. Thus, we permuted the phenotypes to  
196 simulate the null hypothesis of no connection between the SNP data and each behavior.  
197 We then compared the estimate of the SNP heritability from the real data with the  
198 estimates from each of 10,000 permutations. This test supports the initial heritability  
199 estimates indicating a genetic component for host choice (human vs. cow fed; permuted  
200  $P = 0.001$ ) and no genetic component for resting behavior (indoor vs. outdoor, permuted



201  $P = 0.470$ ). Due to the lack of evidence for a genetic component for resting behavior, we  
202 restricted further analysis to elucidating the observed association between host choice  
203 and genotype.

204

### 205 **Genetic structure**

206 To test for the existence of genetic structure within our set of 48 sequenced genomes,  
207 individuals were partitioned by genetic relatedness using a principle component analysis  
208 on all SNPs (PCA; see methods). Using this approach, we observed 3 discrete genetic  
209 clusters (Figure 2a). Genome-wide  $F_{ST}$  in sliding windows between individuals in each  
210 PCA cluster (see methods) revealed that the clusters can be explained by distinct  
211 combinations of 3Ra and 2Rb chromosome inversion states (Figure 2b). Using a novel  
212 inversion genotyping assay (see methods), we determined the 2Rb and 3Ra inversion  
213 states for individuals represented in each PCA cluster (2Rb\_3Ra): left = bb\_a+, middle  
214 = bb\_++, and right = b+\_++. There was an enrichment of cattle-fed mosquitoes among  
215 bb\_++ individuals ( $P < 0.001$ ; Fisher Exact with Freeman-Halton extension).

216

### 217 **Testing for associations between inversion state and host choice**

218 To explore the relationship between the 3Ra and 2Rb inversion state and host choice,  
219 we developed and employed a novel inversion genotyping assay. In brief, we selected  
220 SNPs near the inversion breakpoints with extreme  $F_{ST}$  values between genomes  
221 grouped by distinct 3Ra or 2Rb inversion states. We then genotyped our 11 inversion  
222 diagnostic SNPs (3Ra=6, 2Rb=5) in parallel using the Sequenome iPLEX platform (see  
223 methods). In total, we genotyped 363 bloodfed females from the village of Lupiro for  
224 inversion state. The sample was composed primarily of human-fed (37%) or cattle-fed  
225 mosquitoes (36%; Table S7). The 2Rb and 3Ra inversion frequencies were within  
226 Hardy-Weinberg (HW) expectations for all samples ( $P = 0.55$  and  $0.90$ , respectively).  
227 However, the 3Ra inversion was outside of HW among dog-fed individuals ( $P = 0.02$ ;  
228  $N=40$ , Table S7). Only four 3Ra homozygotes were observed ( $N=363$ ); three fed on dog



229 and one fed on human. The frequency of the 3Ra inversion in Lupiro ranged from  
230 7.94% in cattle to 16.67% in pig-fed mosquitoes. The 2Rb inversion ranged from  
231 81.06% in human to 95% in dog-fed specimens (Table S5). We focused on three major  
232 comparisons to test for a relationship between inversion state and host choice: 1) cattle-  
233 fed versus human-fed, 2) human-fed versus non-human-fed, and 3) cattle-fed versus  
234 non-cattle-fed. After correcting for multiple tests (significant  $P = 0.017$ ), there was no  
235 evidence for an enrichment of standard arrangement of 3Ra (3R+) in cattle-fed  
236 mosquitoes compared to human-fed ( $P = 0.047$ ,  $\chi^2$ ; N=263; Table 1) and no relationship  
237 was detected between 3Ra and human-fed versus non-human-fed mosquitoes ( $P =$   
238  $0.553$ ,  $\chi^2$ ; N=263; Table 1b). However, a significant enrichment of the standard  
239 arrangement of 3Ra was observed in cattle-fed versus non-cattle-fed ( $P = 0.007$ ,  $\chi^2$ ,  
240 N=363; Table 1).

241

#### 242 **Candidate genes within 3Ra**

243 Due to the association between host choice and 3Ra, we explored allelic variation in  
244 genes in the “odorant binding” gene ontology category (GO:0005549) that occur within  
245 the 3Ra breakpoints. To accomplish this, we sorted selected genes by mean  $F_{ST}$   
246 estimates at each gene level (plus 1kb upstream) between 3Ra standard (N=39) and  
247 3Ra inverted (N=9) genomes (Table S8). Among the genes with the highest  $F_{ST}$  was  
248 odorant binding protein antennal (5<sup>th</sup> highest mean  $F_{ST} = 0.2$ ) and the odorant receptor  
249 *Or65* (10<sup>th</sup> highest mean  $F_{ST} = 0.18$ ; Table S8).

250

## 251 **Discussion**

252 In this study, we elucidate the genetic basis of host choice and resting behavior in *An.*  
253 *arabiensis* using whole genome sequencing and a novel chromosomal inversion  
254 genotyping assay. We did not detect a genetic component (“SNP heritability”) for resting  
255 behavior (endo- versus exo-phily). This could be due to substantial “behavioral  
256 plasticity” in this phenotype, which would make this phenotype difficult to detect with

257 field collected samples [33,34]. However, a genetic component was detected for host  
258 choice based on genome-wide SNP data. Using population-scale inversion genotyping,  
259 we show that the 3Ra inversion (or linked alleles) is involved. Identifying functional  
260 alleles underlying host choice in *An. arabiensis* is particularly exciting because this  
261 species has become the dominant malaria vector in many parts of East Africa, where  
262 insecticide use is common [13,35–37]. We highlight two intriguing candidate genes  
263 within the 3Ra, including odorant binding protein antennal. The *An. gambiae* ortholog is  
264 *Obp5*, which is the highest expressed odorant binding protein (OBP) in female antennae  
265 and is significantly overexpressed in female versus male heads [38]. Thus, *Obp5* is  
266 likely involved in host seeking behavior, which is female-specific. *Obp5* is also  
267 significantly overexpressed in non-bloodfed females compared to 24 hours after blood  
268 feeding [39], further implicating its importance in host seeking behavior. We also  
269 detected allelic variation in Or65 between 3Ra inversion arrangements. This is a “highly  
270 tuned” odorant receptor, that has been shown to be responsive to 2-ethylphenol, a  
271 compound found in animal urine [40]. As host choice is directly linked to malaria  
272 transmission, elucidating the genetic basis of this behavioral phenotype may lead to  
273 innovative tools for vector control. The inversion genotyping assay described herein  
274 may be a valuable monitoring tool (e.g. after GMM release or zooprophylaxis),  
275 potentially indicating the relative feeding plasticity of a population based on the  
276 frequency of 3Ra.

277

### 278 **Associating SNPs with human- and cattle-fed *An. arabiensis***

279 “SNP heritability” provides an estimate of the correlation between phenotype and  
280 genome-wide SNP genotypes from pairs of individuals sampled from a population [32].  
281 A strength of this metric is its robustness to complex phenotypes that are influenced by  
282 many small-effect mutations, which may be the case for host choice in *An. arabiensis*.  
283 In this study, we collected mosquitoes that were blood-fed and resting indoors or  
284 outdoors to assess the genetic basis of host choice and indoor resting behavior. Each

285 phenotype is complex and may be affected, at least in part, by innate preference and  
286 the local environment, including host availability and indoor resting sites. Despite our  
287 inability to control for environmental heterogeneities in this field experiment, the SNP  
288 heritability analysis detected a genetic component for host choice. Due to the low LD  
289 (~200bp) across the genome of this species [41], increased samples sizes (e.g. 100-  
290 1000) are needed to get a quantitative estimate of the SNP heritability of host choice  
291 and potentially uncover additional candidate genes. Larger sample sizes may also  
292 uncover a genetic component to resting behavior, which we did not detect here but  
293 cannot rule out. Previously, high inversion polymorphism has been detected in *An.*  
294 *arabiensis* in malarious areas in Nigeria with some inversions showing changes in  
295 frequencies linked to different geographical areas [42]. This could be linked to selection  
296 pressures driven by vector control and/or host availability on resting and feeding  
297 behavior.

298

### 299 **Cattle-feeding linked to the 3Ra inversion**

300 A principal component analysis on genome-wide SNPs resulted in 3 discrete clusters  
301 distinguishable by the 3Ra and 2Rb inversion (Figure 2). There was no significant  
302 enrichment among the 48 sequenced individuals in any given cluster ( $\chi^2$ ;  $P = 0.23$ ).  
303 However, the distribution of human- and cattle-fed mosquitoes among the clusters was  
304 non-random ( $P < 0.01$ ; 2x3 Fisher Exact), suggesting that the inversion/s may contain  
305 alleles related to host choice. In *An. arabiensis*, indirect associations have also been  
306 made between host choice and inversions, like 3Ra in Ethiopia [18] and Kenya [43]. A  
307 non-random distribution of the 2Rb inversion has also been reported between human-  
308 and cattle-fed mosquitoes [19], but we are unaware of *An. arabiensis* studies with  
309 paired karyotype and host choice information from each individual mosquito.

310

311 To test for an association between host choice and these inversions with a much larger  
312 sample size, we developed a novel inversion genotyping assay (see methods). It should

313 be noted that the inversions represent one or more linked alleles among many possible  
314 other contributing alleles throughout the genome. To ensure that our genotyping method  
315 was robust, we selected multiple SNPs near the inversion breakpoints for each  
316 inversion (see stars in Figure 2b). We associated the inversion genotype results to the  
317 standard or inverted arrangement of the 2Rb and 3Ra by genotyping 15 karyotyped  
318 samples (Table S5). This allowed us to determine the inversion state and bloodmeal  
319 source (host) from each individual in a high-throughput and economical fashion. Further  
320 testing is needed to assess how well this assay would perform with *An. arabiensis*  
321 samples from outside our study sites in Tanzania.

322

323 Using this molecular karyotyping method, we observed an enrichment of the standard  
324 arrangement of 3Ra among cattle-fed mosquitoes ( $p=0.007$ ,  $\chi^2$ ,  $N=363$ ; Table 1b). The  
325 frequency of the 3Ra inversion in dog-fed, goat-fed, and human-fed mosquitoes was  
326 substantially higher than cattle-fed mosquitoes (Table 1). Overall, the frequencies of  
327 3Ra were within Hardy Weinberg expectations ( $P=0.55$ ; Table S7). Notably, there was  
328 an enrichment of 3Ra/a homozygotes among dog-fed mosquitoes ( $P=0.02$ ; Table S7).  
329 These genotypes are so rare in Tanzania, some have postulated the presence of a  
330 recessive lethal in 3Ra [44]. The enrichment of 3R+ among cattle-fed mosquitoes is  
331 strong support for a genetic component to host choice, which is consistent with the  
332 report that zoophily can be selected for [17]. The fact that all other species in the  
333 *Anopheles gambiae* species complex are fixed for the standard arrangement of 3Ra,  
334 strongly suggests that 3Ra is derived [45]. Thus, one possible explanation for this  
335 pattern in *An. arabiensis* is that the standard arrangement of 3Ra (3R+) is the ancestral  
336 state and alleles therein facilitate specialization on cattle. A loss-of-function mutation  
337 was then acquired early on in a gene or gene network that is critical to specializing on  
338 bovids in the haplotype representing the inverted arrangement of 3Ra. As a result,  
339 individuals with the 3Ra are more opportunistic feeders. This hypothesis is consistent  
340 with behavioral heterogeneities and 3Ra frequencies across Africa. For example, *An.*

341 *arabiensis* is reportedly more anthropophilic in West African countries like Burkina Faso  
342 and Mali [46,47], where the frequency of 3Ra is very high (~40-60%; [48–51]) compared  
343 to East African populations, like our field site in Tanzania (~12% or less), and others  
344 [18,43,52–54]. The diversity of host feeding behaviors, including both generalists (e.g.  
345 *An. arabiensis* with 3Ra) and specialists (e.g. *An. gambiae* s.s.) among species in the  
346 *An. gambiae* complex make this a fascinating system to study the evolution of host  
347 preference.

348

349 While we provide strong evidence for a role of allelic variation within 3Ra underlying *An.*  
350 *arabiensis* host choice, the effect size (i.e. relative contribution to the phenotype) is  
351 unclear. Correcting for environmental variation is likely very important when choosing  
352 representative samples for each genotype. For example, a human-fed mosquito may be  
353 more meaningful if there is an abundance of alternative hosts nearby (e.g. cattle). This  
354 was shown by Tirados et al. [55], where *An. arabiensis* was found to persistently bite  
355 humans despite being surrounded by cattle, negating a zoophylactic effect of cattle.  
356 This highlights the importance of integrating genetic analyses into a wider context.  
357 Colony-based host preference assays involving representatives from each 3Ra  
358 inversion state in a controlled environment may be the most effective way forward.  
359 Previous tests for population structure only revealed differentiation between distant  
360 villages [41]. Thus, by comparing individual genomes representing host choice  
361 phenotypes (and resting behavior) from within the same village (Lupiro), we limited the  
362 identification of demographic SNPs in our data set. However, to assess the role of 3Ra  
363 more broadly, additional studies involving study sites across the range of *An. arabiensis*  
364 are needed.

365

### 366 **Environmental component to host choice**

367 In this study, mosquitoes were sampled directly from the field, which enabled us to  
368 examine the contribution of environmental heterogeneity to the host choice phenotype.

369 Cattle was the preferred host at each collection site, but we found differences in relative  
370 host-choice patterns between villages. For example, the human-fed mosquitoes were  
371 significantly more common in Lupiro (24%) versus in Minepa (7%) and Sagamaganga  
372 (11%, Fisher exact  $P < 0.0001$ ). This trend varied by collection year (Table S2). The  
373 decreased human blood index in households with livestock nearby (Table S11) and  
374 lower frequency of human-fed mosquitoes collected in outdoor traps, where both cattle  
375 and humans are available, indicates that local host availability has a major influence on  
376 host choice and is consistent with previous reports [16]. As individuals with the standard  
377 arrangement of 3Ra appear to prefer cattle (Table 1), the effect of host availability on  
378 host choice will likely be stronger in populations where the inverted arrangement of 3Ra  
379 is relatively rare.

380

### 381 **Future directions**

382 This study presents important data suggesting a genetic component to host choice in  
383 the malaria vector *An. arabiensis*. We show that the 3Ra inversion is involved, at least  
384 in part. This association and the introduction of a novel inversion genotyping assay may  
385 be a valuable tool for future malaria control strategies involving *An. arabiensis*. For  
386 example, tracking the frequency of the 3Ra in *An. arabiensis* may elucidate the  
387 emergence of behavioral avoidance (e.g. shifting toward zoophily) so countermeasures  
388 can be implemented. A better understanding of the genetic basis for host choice in *An.*  
389 *arabiensis* may also improve vector control if cattle-biting mosquitoes can be genetically  
390 engineered and released in the population, having an effect similar in concept to  
391 zooprophylaxis [56].

392

393 Due to the existence of substantial genetic and environmental components to the host  
394 choice phenotype in *An. arabiensis*, an important next step from this study would be to  
395 establish *An. arabiensis* colonies, ideally from Lupiro, that are representative of each  
396 inversion state and perform choice assays in controlled environmental conditions.

397

## 398 **Materials and Methods**

### 399 **Mosquito collection area**

400 The mosquitoes were collected within 3 villages in the Kilombero River Valley in south-  
401 eastern Tanzania: Lupiro (S08°23.2956'; E036°40.6122'), Minepa (S08°16.4974';  
402 E036°40.7640') and Sagamaganga (S08°03.8392'; E036°47.7709'). The Kilombero  
403 Valley is dominated by irrigated and rain-fed rice paddies and maize fields bordered by  
404 woodland. The annual rainfall is 1200-1800 mm with two rainy seasons. The average  
405 daily temperatures range between 20°C and 33°C. Most people in this area are  
406 subsistence farmers and/or livestock keepers. Mud or brick houses stand in clusters  
407 among a few trees or banana trees. If a household owns livestock, the animals are kept  
408 outside a few meters away from the house in sheds (pigs and goats) or within simple  
409 cattle fences. Animal sheds with walls and a roof were considered indoor resting areas.  
410 Inside houses you will regularly find chickens, cats and sometimes dogs. The  
411 mosquitoes will encounter bed nets inside almost all houses in the valley, but no  
412 repellents are currently used by people outdoors [57] and livestock are not treated with  
413 insecticide [58]. Malaria is endemic in these communities and although prevalence is  
414 declining, almost all inhabitants have antibodies for the disease [59]. The dominant  
415 malaria vector species are *An. arabiensis* and the *An. funestus* group [60].

416

### 417 **Collection methods**

418 In each village, households chosen for collection were within 100-200m of one another.  
419 Indoor mosquito collection method was aspiration using a standard battery-powered  
420 CDC Back Pack aspirator (BP, Model 1412, John Hock, Florida USA) [61]. In these  
421 collections, the aspirator was used to collect mosquitoes from the main bedroom by  
422 sweeping the nozzle over the interior walls, roof and furniture for a fixed period of ten



423 minutes. BP collections were timed to standardize sampling effort across houses. A  
424 resting bucket trap (RBU) was used to trap mosquitoes outdoors. The RBU is made from  
425 a standard 20 liter plastic bucket lined with black cotton cloth, and set by placing it on its  
426 side with the open end facing a house at a distance of approximately 5m. A small wet  
427 cloth is placed inside the bucket to increase humidity. Mosquitoes resting inside RBUs  
428 were collected at dawn by placing the nozzle of a battery-powered modified CDC  
429 backpack aspirator at the open end of the bucket and aspirating for 10-20 seconds.

430

### 431 **Ethics**

432 Before collection, meetings were held with community leaders in all villages during  
433 which they were informed about the purpose of the study and their participation  
434 requested. After their permission had been granted, the study team visited each village  
435 and informed consent was obtained from each head of household where trapping was  
436 conducted. Research clearance was obtained from the institutional review board of  
437 Ifakara Health Institute in Tanzania (IHI/IRB/No: 16-2013) and by the National Institute  
438 for Medical Research in Tanzania (NIMR/HQ/R.8c/Vol. II/304).

439

### 440 **DNA extraction**

441 For each specimen, the abdomen was separated from the head and thorax; DNA was  
442 extracted separately from each using the QIAGEN Biosprint 96 system and QIAGEN  
443 blood and tissue kits (QIAGEN, Valencia, CA). *Anopheles arabiensis* samples were  
444 distinguished from other *An. gambiae* s.l. species complex members with the Scott  
445 polymerase chain reaction assay [62] and their DNA content was quantified using the  
446 Qubit 2.0 Fluorometer (Life technologies, Grand Island, NY).

447

### 448 **Bloodmeal analysis**

449 The specific host species that each mosquito had fed upon was determined by a  
450 multiplex genotyping assay on DNA extracted from abdomens [63]. This multiplex  
451 genotyping assay can distinguish between blood from cattle, goat, pig, dog, chicken and  
452 human.

453

#### 454 **Analysis of host choice**

455 Statistical analysis was conducted to compare the proportion of human-fed mosquitoes  
456 in total between villages and of these the proportion caught resting indoors using the  
457 statistical software R (Core-Team RD, 2013). Variation in the proportion of human-fed  
458 *An. arabiensis* within the total catch was investigated. Samples found to contain any  
459 human blood represented one category and those containing animal blood another.  
460 Generalized linear mixed effects models (GLMM, package lme4 in R [64]) were used,  
461 with human-fed mosquitoes versus animal-fed mosquitoes as a response variable with  
462 a binomial distribution and fitting village and livestock presence as fixed effects, and  
463 date and house of collection as random effects. To be able to explore the resting  
464 behavior of *An. arabiensis*, only mosquitoes resting in houses or outdoors but not those  
465 caught resting in animal sheds were used for analysis. Here the GLMM were fitted for  
466 each village separately with human-fed mosquitoes caught indoors versus outdoors as  
467 a response variable with a binomial distribution and livestock as fixed effect and date  
468 and house of collection as random effects.

469

#### 470 **Cytogenetic analysis**

471 To identify 3Ra, 2Rb, and 2Rc chromosomal inversions, polytene chromosomes were  
472 extracted from ovarian nurse cells from half gravid indoor resting mosquitoes using the  
473 protocol described by Hunt [65]. Chromosome banding patterns were examined using a  
474 Nikon Eclipse e600 phase contrast microscope. The genotypes of the chromosome  
475 inversions were scored for each individual mosquito. Photographic images of

476 chromosomes for the majority of individual mosquitoes used in this study are available  
477 on PopI OpenProject page - AaGenome  
478 (<https://popi.ucdavis.edu/PopulationData/OpenProjects/AaGenome>).

479

## 480 **Genomic library preparation and sequencing**

481 To avoid identifying SNPs associated with demography or other environmental factors,  
482 we chose to sequence mosquitoes collected from only one village, Lupiro. We focused  
483 on this village because it had sufficient human-fed mosquitoes for testing (Figure 1).  
484 Genomic DNA was quantified using a Qubit 2.0 fluorometer (Life Technologies). We  
485 used 25-50ng of input DNA for library construction. DNA was then cleaned and  
486 concentrated with the DNA Clean and Concentrator kit (Zymo Research Corporation).  
487 Library preparations were made with the Nextera DNA Sample Preparation Kit  
488 (Illumina), using TruSeq dual indexing barcodes (Illumina). Libraries were size-selected  
489 with Agencourt AMPure XP beads (Beckman Coulter). We assessed the insert size  
490 distribution of the final libraries using a QIAxcel instrument (Qiagen, Valencia, CA) or  
491 Bioanalyzer 2100 (Agilent), and the final library concentration was measured with a  
492 Qubit 2.0 fluorometer (Life Technologies). Individually barcoded libraries were  
493 sequenced with the Illumina HiSeq2500 platform with paired-end 100 base pair reads,  
494 at the QB3 Vincent J Coates Genomics Sequencing Laboratory at UC Berkeley. See  
495 Table S1 for raw sequence output per sample.

496

## 497 **Genome sequence mapping and SNP identification**

498 We assessed the quality of our genome sequencing reads using the FastQC software  
499 (<http://www.bioinformatics.babraham.ac.uk/projects/fastqc/>). Adaptor sequences and  
500 poor quality sequence were trimmed from the raw Illumina Fastq reads using the  
501 Trimmomatic software, version 0.30 [66], with default options. Reads were aligned with  
502 BWA-mem [67] to the assembled *An. arabiensis* reference genome version AaraCHR

503 (generously provided by Xiaofang Jiang, Brantley Hall, and Igor Sharakhov. Also see  
504 [68]). We used the MarkDuplicates module from Picard tools to remove PCR duplicates  
505 and the Genome Analysis Tool Kit (GATK) v1.7 to realign reads around indels [69]. The  
506 resulting sorted BAM (Binary sequence Alignment/Map) files containing sequences for  
507 each read and its mapping position were then used to make a VCF (Variant Call  
508 Format) file using samtools (v1.1-12) 'mpileup' and bcftools (v1.1-36) multiallelic-caller.  
509 We removed indels using VCFtools (v0.1.13; "--remove-indels") and filtered for variable  
510 sites using a minor allele frequency threshold of 0.10 ("--maf 0.1") and a major allele  
511 threshold of 0.9 ("--max-maf 0.9").

512

### 513 **Estimating SNP heritability of each phenotype**

514 Host choice and resting behavior phenotypes may be influenced by many small-effect  
515 mutations across the genome. SNP heritability is the correlation between the genome-  
516 wide genotypic variation and phenotypic variance ( $V(G) / V(p)$ ). To estimate SNP  
517 heritability, the VCF file containing genome-wide SNP data for all samples was  
518 converted to PLINK with VCFtools (command "vcftools --plink") and then binary ped files  
519 (GCTA option: "--make-bed") for analysis with the Genome-Wide Complex Trait  
520 Analysis software (GCTA; [70]. To calculate "SNP heritability" with GCTA, we first  
521 generated a genetic relationship matrix. Then we calculated SNP heritability for host  
522 choice (estimated human-fed prevalence = 20%) and resting behavior (estimated indoor  
523 prevalence = 43%). To estimate the permuted p-value, we used a custom python script  
524 to randomly permute the phenotype key for 10000 iterations (see supporting  
525 information). The permuted p-value was estimated from the proportion of heritability  
526 estimates from the randomly permuted phenotype key that were greater than the  
527 heritability estimate from the real data.

528

### 529 **Chromosomal inversion genotyping assay**

530 We used GCTA [70] to perform a principal component analysis (PCA) on all whole  
531 genome sequenced individuals from Lupiro. This partitioned the individuals into at least  
532 three clusters. Genomic differentiation among the three clusters was concentrated in  
533 regions corresponding to 2Rb and 3Ra inversions (Figure 2). We identified candidate  
534 diagnostic SNPs between the three clusters using  $F_{ST}$  values. We selected 6 diagnostic  
535 SNPs for 3Ra that span 19.76Mbp, and 5 diagnostic SNPs for 2Rb spanning 6Mbp  
536 (Table S4). A multiplex SNP genotyping assay was designed for an iPLEX assay  
537 platform using Sequenom Typer AssayDesigner program (Sequenom, Table S3). The  
538 Veterinary Genetics Laboratory at UC Davis performed Genotyping using the  
539 Sequenom iPLEX.

540

#### 541 **Data accessibility**

542 The genetic information and meta data associated with this study are available on dryad  
543 and on the open source online vector database Popl: AaGenome  
544 (<https://popi.ucdavis.edu/PopulationData/OpenProjects/AaGenome/>).

545

#### 546 **Competing interests**

547 The authors declare that they have no competing interests.

548

#### 549 **Author's contributions**

550 BJM conducted the experiment, data analysis and wrote manuscript. YL and GCL  
551 conceived the experiment, conducted field collections, and wrote the manuscript. HF  
552 conceived the overall study and helped with the manuscript. KSK coordinated and  
553 conducted field collections, analyzed data and contributed to the manuscript. TCC and  
554 EYK conducted data analysis. EE performed data analysis and helped write the  
555 manuscript. AJC conducted field collections and cytogenetic analysis. AK helped

556 coordinate and implement field studies and mosquito databases. NJG contributed to the  
557 manuscript. CCN and AMW performed molecular work.

558

## 559 **Acknowledgements**

560 We thank Julia Malvick at the Veterinary Genetics Laboratory for her assistance in  
561 iPLEX SNP genotyping and three anonymous reviewers for their comments on the  
562 previous version of this manuscript. We also thank the inhabitants of Lupiro, Minepa  
563 and Sagamaganga for their collaboration during field sampling. Sequencing was  
564 performed by the Vincent J. Coates Genomics Sequencing Laboratory at UC Berkeley,  
565 supported by NIH S10 Instrumentation Grants S10RR029668 and S10RR027303.  
566 Financial support was provided, in part, by the National Institutes of Health grants  
567 R01AI085175-03 and T32AI074550.

568

## 569 **Figures**

570 **Figure 1. Relative host choice between villages.**

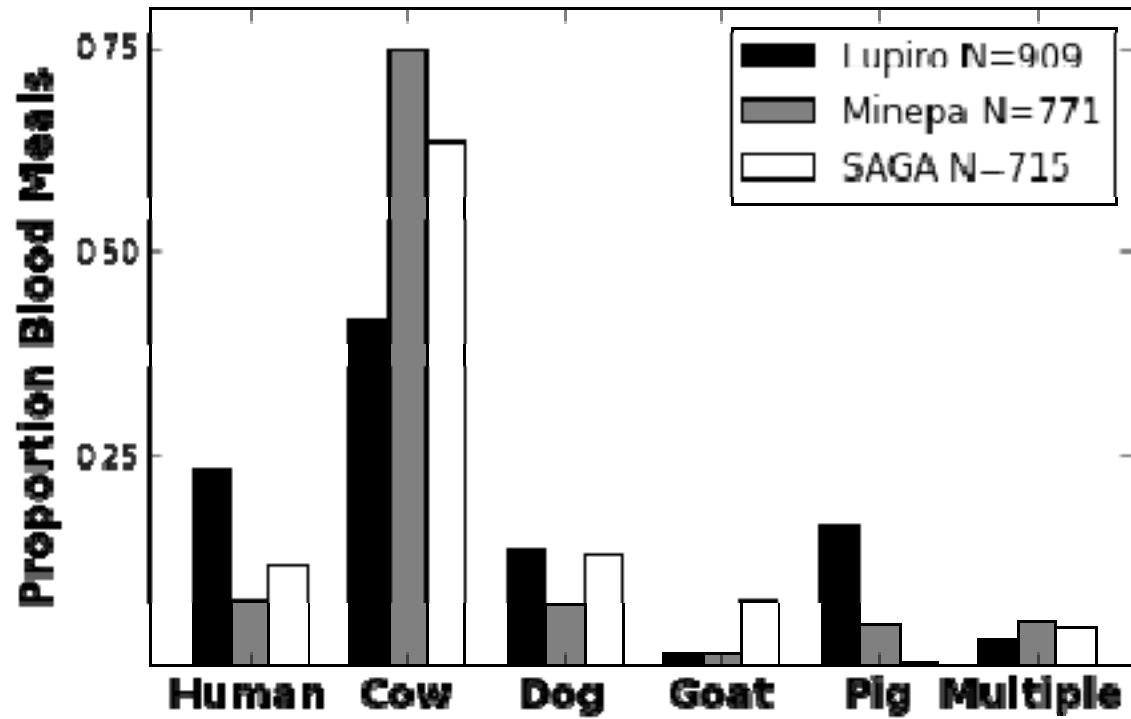

571

572 This figure describes the results of bloodmeal analysis of *An. Arabiensis* collected from: Lupiro, Minepa,  
573 and Sagamaganga (SAGA). We detected multiple hosts in <5% of individuals. Different combinations of  
574 mixed host bloodmeals were pooled and shown as "Multiple". A few chicken bloodmeals were also  
575 detected in each site (not shown).

576

577 **Figure 2. Genetic variation explained by the 2Rb and 3Ra inversions.**



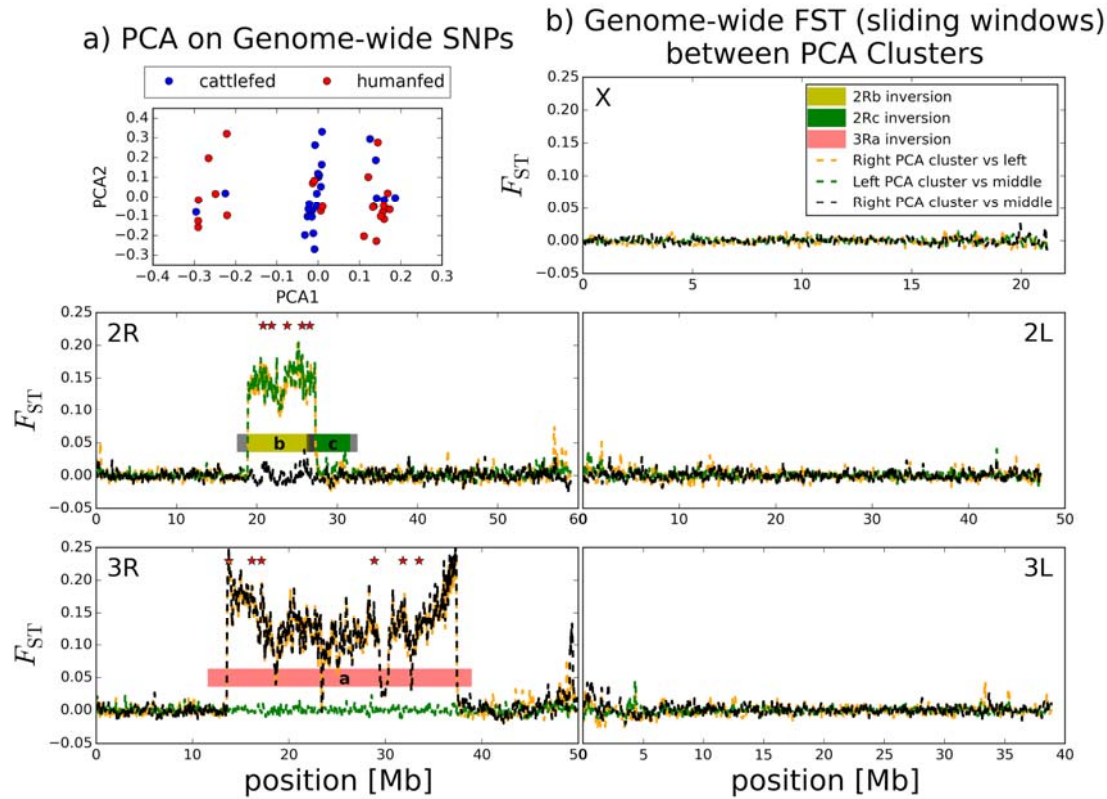

578

579 Figure 2: a) Genetic structure was assessed using genome-wide SNP data for individual *An. arabiensis*  
580 females using a PCA analysis. Three discrete PCA clusters were observed. Red = human-fed and blue =  
581 cattle-fed. There is an enrichment of cattle-fed individuals in the middle PCA cluster ( $P < 0.001$ ; Fisher  
582 Exact). (b) To reveal differentiated genomic regions underlying the distinct PCA clusters (left, middle, and  
583 right) we plotted  $F_{ST}$  for each chromosome in 100kb windows with 20kb steps between the PCA clusters.  
584 The outside PCA clusters differed at the 2Rb and 3Ra inversions (orange), left versus middle PCA  
585 clusters differed at 2Rb only (green), and right versus middle differed at 3Ra only (black). Stars indicate  
586 the position of SNPs chosen for the inversion genotyping assay.

587

## 588 Tables

589 Table 1: Inversion frequencies by host

Table 1: Inversion frequencies by host - Lupiro

| Host         | ++  | a+ | aa | N          | a   | +   | freq a |
|--------------|-----|----|----|------------|-----|-----|--------|
| human        | 99  | 32 | 1  | 132        | 34  | 230 | 12.88% |
| cattle       | 106 | 20 | 0  | 126        | 20  | 232 | 7.9%   |
| pig          | 38  | 19 | 0  | 57         | 19  | 95  | 16.67% |
| dog          | 30  | 7  | 3  | 40         | 13  | 67  | 16.25% |
| goat         | 2   | 1  | 0  | 3          | 1   | 5   |        |
| cattle+goat  | 2   | 0  | 0  | 2          | 0   | 4   |        |
| human+cattle | 1   | 0  | 0  | 1          | 0   | 2   |        |
| dog+human    | 0   | 1  | 0  | 1          | 1   | 1   |        |
| dog+pig      | 1   | 0  | 0  | 1          | 0   | 2   |        |
|              |     |    |    | human      | 35  | 233 | 13.06% |
|              |     |    |    | non-human  | 53  | 405 | 11.57% |
|              |     |    |    | cattle     | 20  | 238 | 7.75%  |
|              |     |    |    | non-cattle | 68  | 400 | 14.53% |
|              |     |    |    |            |     |     |        |
| Host         | ++  | b+ | bb | N          | b   | +   | freq b |
| human        | 4   | 42 | 86 | 132        | 214 | 50  | 81.06% |
| cattle       | 4   | 33 | 89 | 126        | 211 | 41  | 83.73% |
| pig          | 1   | 18 | 38 | 57         | 94  | 20  | 82.46% |
| dog          | 0   | 4  | 36 | 40         | 76  | 4   | 95.00% |
| goat         | 0   | 1  | 2  | 3          | 5   | 1   |        |
| cattle+goat  | 0   | 1  | 1  | 2          | 3   | 1   |        |
| human+cattle | 0   | 0  | 1  | 1          | 2   | 0   |        |
| human+dog    | 0   | 1  | 0  | 1          | 1   | 1   |        |
| dog+Pig      | 0   | 0  | 1  | 1          | 2   | 0   |        |
|              |     |    |    | human      | 217 | 51  | 80.97% |
|              |     |    |    | non-human  | 391 | 67  | 85.37% |
|              |     |    |    | cattle     | 216 | 42  | 83.72% |
|              |     |    |    | non-cattle | 392 | 76  | 83.76% |

590

591 *Table 1: Mosquitoes were collected from the village of Lupiro. The inversion frequencies*

592 *(freq a or b) were not calculated for host categories with low sample sizes. The sum of*

593 *human- and cattle-fed mosquitoes (bottom four categories) included pure (e.g. human)*  
594 *and mixed host (e.g. dog+human) samples.*

595

## 596 **References**

- 597 1. WHO. Global plan for insecticide resistance management in malaria vectors. World Health  
598 Organization Press, Geneva, Switzerland. 2012; Available:  
599 [http://whqlibdoc.who.int/publications/2012/9789241564472\\_eng.pdf](http://whqlibdoc.who.int/publications/2012/9789241564472_eng.pdf)
- 600 2. Murray CJ, Lopez AD. Global mortality, disability, and the contribution of risk factors: Global  
601 Burden of Disease Study. *Lancet*. 1997;349: 1436–1442.
- 602 3. Takken W, Verhulst NO. Host preferences of blood-feeding mosquitoes. *Annu Rev*  
603 *Entomol*. Annual Reviews 4139 El Camino Way, P.O. Box 10139, Palo Alto, CA 94303-  
604 0139, USA; 2013;58: 433–453.
- 605 4. Macdonald G. The epidemiology and control of malaria. *The Epidemiology and Control of*  
606 *Malaria*. London, Oxford Univ. Pr.; 1957; Available:  
607 <http://www.cabdirect.org/abstracts/19581000237.html>
- 608 5. Derua YA, Alifrangis M, Hosea KM, Meyrowitsch DW, Magesa SM, Pedersen EM, et al.  
609 Change in composition of the *Anopheles gambiae* complex and its possible implications for  
610 the transmission of malaria and lymphatic filariasis in north-eastern Tanzania. *Malar J*.  
611 *BioMed Central Ltd*; 2012;11: 188.
- 612 6. Gatton ML, Chitnis N, Churcher T, Donnelly MJ, Ghani AC, Godfray HCJ, et al. The  
613 importance of mosquito behavioural adaptations to malaria control in Africa. *Evolution*.  
614 2013;67: 1218–1230.
- 615 7. Lyimo IN, Ferguson HM. Ecological and evolutionary determinants of host species choice in  
616 mosquito vectors. *Trends Parasitol*. 2009;25: 189–196.
- 617 8. Mwangangi J, Muturi E, Muriu S, Nzovu J, Midega J, Mbogo C. The role of *Anopheles*  
618 *arabiensis* and *Anopheles coustani* in indoor and outdoor malaria transmission in Taveta  
619 District, Kenya. *Parasit Vectors*. 2013;6: 114.
- 620 9. Russell TL, Govella NJ, Azizi S, Drakeley CJ, Kachur SP, Killeen GF. Increased  
621 proportions of outdoor feeding among residual malaria vector populations following  
622 increased use of insecticide-treated nets in rural Tanzania. *Malar J*. *BioMed Central Ltd*;  
623 2011;10: 80.
- 624 10. Lindblade KA, Gimnig JE, Kamau L, Hawley WA, Odhiambo F, Olang G, et al. Impact of  
625 sustained use of insecticide-treated bednets on malaria vector species distribution and

- 626 culicine mosquitoes. *J Med Entomol.* 2006;43: 428–432.
- 627 11. Zhou G, Afrane YA, Vardo-Zalik AM, Atieli H, Zhong D, Wamae P, et al. Changing Patterns  
628 of Malaria Epidemiology between 2002 and 2010 in Western Kenya: The Fall and Rise of  
629 Malaria. *PLoS One. Public Library of Science*; 2011;6: e20318.
- 630 12. Mutuku FM, King CH, Mungai P, Mbogo C, Mwangangi J, Muchiri EM, et al. Impact of  
631 insecticide-treated bed nets on malaria transmission indices on the south coast of Kenya.  
632 *Malar J.* 2011;10: 356.
- 633 13. Bayoh MN, Mathias DK, Odiere MR, Mutuku FM, Kamau L, Gimnig JE, et al. *Anopheles*  
634 *gambiae*: historical population decline associated with regional distribution of insecticide-  
635 treated bed nets in western Nyanza Province, Kenya. *Malar J. BioMed Central Ltd*; 2010;9:  
636 62.
- 637 14. Bugoro H, Hii J, Russell T, Cooper R, Chan B, Iro'ofa C, et al. Influence of environmental  
638 factors on the abundance of *Anopheles farauti* larvae in large brackish water streams in  
639 Northern Guadalcanal, Solomon Islands. *Malar J.* 2011;10: 262.
- 640 15. Ferguson HM, Dornhaus A, Beeche A, Borgemeister C, Gottlieb M, Mulla MS, et al.  
641 Ecology: a prerequisite for malaria elimination and eradication. *PLoS Med.* 2010;7:  
642 e1000303.
- 643 16. Mayagaya V, Nkwengulila G, Lyimo I, Kihonda J, Mtambala H, Ngonyani H, et al. The  
644 impact of livestock on the abundance, resting behaviour and sporozoite rate of malaria  
645 vectors in southern Tanzania. *Malar J.* 2015;14: 17.
- 646 17. Gillies MT. Selection for host preference in *Anopheles gambiae*. *Nature. Nature Publishing*  
647 *Group*; 1964;203: 852–854.
- 648 18. Lulu M, Hadis M, Makonnen Y, Asfa T. Chromosomal inversion polymorphisms of  
649 *Anopheles arabiensis* from some localities in Ethiopia in relation to host feeding choice.  
650 *Ethiopian Journal of. researchgate.net*; 1998; 23–28.
- 651 19. Petrarca V, Beier JC. Intraspecific chromosomal polymorphism in the *Anopheles gambiae*  
652 complex as a factor affecting malaria transmission in the Kisumu area of Kenya. *Am J Trop*  
653 *Med Hyg.* 1992;46: 229–237.
- 654 20. Garrett-Jones C. The human blood index of malaria vectors in relation to epidemiological  
655 assessment. *Bull World Health Organ.* 1964;30: 241–261.
- 656 21. McBride CS, Baier F, Omondi AB, Spitzer SA, Lutomiah J, Sang R, et al. Evolution of  
657 mosquito preference for humans linked to an odorant receptor. *Nature. Nature Publishing*  
658 *Group*; 2014;515: 222–227.
- 659 22. Bohbot J, Pitts RJ, Kwon HW, Rützler M. Molecular characterization of the *Aedes aegypti*  
660 odorant receptor gene family. *Insect Mol Biol.* 2007; 525–537.

- 661 23. Fox AN, Pitts RJ, Robertson HM, Carlson JR, Zwiebel LJ. Candidate odorant receptors  
662 from the malaria vector mosquito *Anopheles gambiae* and evidence of down-regulation in  
663 response to blood feeding. *Proc Natl Acad Sci U S A*. 2001;98: 14693–14697.
- 664 24. Rinker DC, Zhou X, Pitts RJ, AGC Consortium, Rokas A, Zwiebel LJ. Antennal  
665 transcriptome profiles of anopheline mosquitoes reveal human host olfactory specialization  
666 in *Anopheles gambiae*. *BMC Genomics*. 2013;14: 749.
- 667 25. Rinker DC, Pitts RJ, Zhou X, Suh E, Rokas A, Zwiebel LJ. Blood meal-induced changes to  
668 antennal transcriptome profiles reveal shifts in odor sensitivities in *Anopheles gambiae*.  
669 *Proceedings of the National Academy of Sciences*. 2013;110: 8260–8265.
- 670 26. Reidenbach K, Cook S, Bertone M, Harbach R, Wiegmann B, Besansky N. Phylogenetic  
671 analysis and temporal diversification of mosquitoes (Diptera: Culicidae) based on nuclear  
672 genes and morphology. *BMC Evol Biol*. 2009;9: 298.
- 673 27. Maxwell CA, Wakibara J, Tho S, Curtis CF. Malaria-infective biting at different hours of the  
674 night. *Med Vet Entomol*. 1998;12: 325–327.
- 675 28. Pates H, Curtis C. Mosquito behavior and vector control. *Annu Rev Entomol*. 2005;50: 53–  
676 70.
- 677 29. Govella NJ, Chaki PP, Killeen GF. Entomological surveillance of behavioural resilience and  
678 resistance in residual malaria vector populations. *Malar J*. 2013;12: 124.
- 679 30. Killeen GF. A second chance to tackle African malaria vector mosquitoes that avoid houses  
680 and don't take drugs. *Am J Trop Med Hyg*. 2013;88: 809–816.
- 681 31. Russell TL, Lwetoijera DW, Maliti D, Chipwaza B, Kihonda J, Charlwood JD, et al. Impact of  
682 promoting longer-lasting insecticide treatment of bed nets upon malaria transmission in a  
683 rural Tanzanian setting with pre-existing high coverage of untreated nets. *Malar J*. 2010;9:  
684 187.
- 685 32. Wray NR, Yang J, Hayes BJ, Price AL, Goddard ME, Visscher PM. Pitfalls of predicting  
686 complex traits from SNPs. *Nat Rev Genet*. Nature Publishing Group; 2013;14: 507–515.
- 687 33. Githeko AK, Service MW, Mbogo CM, Atieli FK. Resting behaviour, ecology and genetics of  
688 malaria vectors in large scale agricultural areas of Western Kenya. *Parassitologia*. 1996;38:  
689 481–489.
- 690 34. Lines JD, Lyimo EO, Curtis CF. Mixing of indoor- and outdoor-resting adults of *Anopheles*  
691 *gambiae* Giles s.l. and *A. funestus* Giles (Diptera: Culicidae) in coastal Tanzania. *Bull*  
692 *Entomol Res*. Cambridge University Press; 1986;76: 171–178.
- 693 35. Braimah N, Drakeley C, Kweka E, Masha F, Helinski M, Pates H, et al. Tests of bednet  
694 traps (Mbita traps) for monitoring mosquito populations and time of biting in Tanzania and  
695 possible impact of prolonged insecticide treated net use. *Int J Trop Insect Sci*. Cambridge

- 696 University Press; 2005;25: 208–213.
- 697 36. Tirados I, Costantini C, Gibson G, Torr SJ. Blood-feeding behaviour of the malarial  
698 mosquito *Anopheles arabiensis*: implications for vector control. *Med Vet Entomol.* 2006;20:  
699 425–437.
- 700 37. Russell TL, Govella NJ, Azizi S, Drakeley CJ, Kachur SP, Killeen GF. Increased  
701 proportions of outdoor feeding among residual malaria vector populations following  
702 increased use of insecticide-treated nets in rural Tanzania. *Malar J.* 2011;10: 80.
- 703 38. Biessmann H, Nguyen QK, Le D, Walter MF. Microarray-based survey of a subset of  
704 putative olfactory genes in the mosquito *Anopheles gambiae*. *Insect Mol Biol.* 2005;14:  
705 575–589.
- 706 39. Marinotti O, Calvo E, Nguyen QK, Dissanayake S, Ribeiro JMC, James AA. Genome-wide  
707 analysis of gene expression in adult *Anopheles gambiae*. *Insect Mol Biol.* 2006;15: 1–12.
- 708 40. Carey AF, Wang G, Su C-Y, Zwiebel LJ, Carlson JR. Odorant reception in the malaria  
709 mosquito *Anopheles gambiae*. *Nature.* 2010;464: 66–71.
- 710 41. Marsden CD, Lee Y, Kreppel K, Weakley A, Cornel A, Ferguson HM, et al. Diversity,  
711 differentiation, and linkage disequilibrium: prospects for association mapping in the malaria  
712 vector *Anopheles arabiensis*. *G3 (Bethesda).* 2014;4: 121–131.
- 713 42. Coluzzi M, Sabatini A, Petrarca V, Di Deco MA. Chromosomal differentiation and  
714 adaptation to human environments in the *Anopheles gambiae* complex. *Trans R Soc Trop  
715 Med Hyg.* 1979;73: 483–497.
- 716 43. Mnzava AE, Mutinga MJ, Staak C. Host blood meals and chromosomal inversion  
717 polymorphism in *Anopheles arabiensis* in the Baringo District of Kenya. *J Am Mosq Control  
718 Assoc.* 1994;10: 507–510.
- 719 44. Mnzava A, Rwegoshora RT. *Anopheles arabiensis* and *An. gambiae* chromosomal  
720 inversion polymorphism, feeding and resting behaviour in relation to insecticide house-  
721 spraying in Tanzania - MNZAVA - 2008 - Medical and Veterinary Entomology - Wiley  
722 Online Library. Medical and .... 1995; Available:  
723 <http://onlinelibrary.wiley.com/doi/10.1111/j.1365-2915.1995.tb00140.x/abstract>
- 724 45. Coluzzi M, Sabatini A, della Torre A, Di Deco MA, Petrarca V. A polytene chromosome  
725 analysis of the *Anopheles gambiae* species complex. *Science.* 2002;298: 1415–1418.
- 726 46. Costantini C, Sagnon NF, della Torre A, Diallo M, Brady J, Gibson G, et al. Odor-mediated  
727 host preferences of West African mosquitoes, with particular reference to malaria vectors.  
728 *Am J Trop Med Hyg.* 1998;58: 56–63.
- 729 47. Costantini C, Sagnon N, della Torre A, Coluzzi M. Mosquito behavioural aspects of vector-  
730 human interactions in the *Anopheles gambiae* complex. *Parassitologia.* [researchgate.net](http://researchgate.net);



- 731 1999;41: 209–217.
- 732 48. Robert V, Petrarca V, Carnevale P, Zoulani A, Coluzzi M. Analyse cytogénétique du  
733 complexe *Anopheles gambiae* dans un village du Sud-Est du Burkina-Faso. *Genet Sel*  
734 *Evol. BioMed Central*; 1990;22: 161.
- 735 49. Robert V, Gazin P, Benasseni R, Carnevale P. Le paludisme urbain à Bobo-Dioulasso  
736 (Burkina Faso). *Urbanisation et santé dans le Tiers Monde: transition épidémiologique,*  
737 *changement social et soins de santé primaires.* 1989; 181–185.
- 738 50. Taylor CE, Toure YT, Coluzzi M, Petrarca V. Effective population size and persistence of  
739 *Anopheles arabiensis* during the dry season in west Africa. *Med Vet Entomol. Wiley Online*  
740 *Library*; 1993;7: 351–357.
- 741 51. Touré YT, Petrarca V, Traoré SF, Coulibaly A, Maiga HM, Sankaré O, et al. The distribution  
742 and inversion polymorphism of chromosomally recognized taxa of the *Anopheles gambiae*  
743 complex in Mali, West Africa. *Parassitologia.* 1998;40: 477–511.
- 744 52. Petrarca V, Beier JC. Intraspecific chromosomal polymorphism in the *Anopheles gambiae*  
745 complex as a factor affecting malaria transmission in the Kisumu area of Kenya. *Am J Trop*  
746 *Med Hyg.* 1992;46: 229–237.
- 747 53. Mnzava AEP, Di Deco MA. Chromosomal inversion polymorphism in *Anopheles gambiae*  
748 and *Anopheles arabiensis* in Tanzania. *Int J Trop Insect Sci. Cambridge University Press*;  
749 1990;11: 861–863.
- 750 54. O’Loughlin SM, Magesa S, Mbogo C, Mosha F, Midega J, Lomas S, et al. Genomic  
751 analyses of three malaria vectors reveals extensive shared polymorphism but contrasting  
752 population histories. *Mol Biol Evol.* 2014;31: 889–902.
- 753 55. Tirados I, Gibson G, Young S, Torr SJ. Are herders protected by their herds? An  
754 experimental analysis of zooprophylaxis against the malaria vector *Anopheles arabiensis*.  
755 *Malar J.* 2011;10: 68.
- 756 56. Burkot TR. Non-Random Host Selection by Anopheline Mosquitos. *Parasitol Today.*  
757 1988;4: 156–162.
- 758 57. Sangoro O, Kelly AH, Mtali S, Moore SJ. Feasibility of repellent use in a context of  
759 increasing outdoor transmission: a qualitative study in rural Tanzania. *Malar J.* 2014;13:  
760 347.
- 761 58. Rowland M, Durrani N, Kenward M, Mohammed N, Urahman H, Hewitt S. Control of  
762 malaria in Pakistan by applying deltamethrin insecticide to cattle: a community-randomised  
763 trial. *Lancet.* 2001;357: 1837–1841.
- 764 59. Kamuyu G, Bottomley C, Mageto J, Lowe B, Wilkins PP, Noh JC, et al. Exposure to  
765 multiple parasites is associated with the prevalence of active convulsive epilepsy in sub-



- 766 Saharan Africa. *PLoS Negl Trop Dis*. 2014;8: e2908.
- 767 60. Lwetoijera DW, Harris C, Kiware SS, Dongus S, Devine GJ, McCall PJ, et al. Increasing  
768 role of *Anopheles funestus* and *Anopheles arabiensis* in malaria transmission in the  
769 Kilombero Valley, Tanzania. *Malar J*. [biomedcentral.com](http://biomedcentral.com); 2014;13: 331.
- 770 61. Clark GG, Seda H, Gubler DJ. Use of the “CDC backpack aspirator” for surveillance of  
771 *Aedes aegypti* in San Juan, Puerto Rico. *J Am Mosq Control Assoc*. 1994;10: 119–124.
- 772 62. Scott JA, Brogdon WG, Collins FH. Identification of single specimens of the *Anopheles*  
773 *gambiae* complex by the polymerase chain reaction. *Am J Trop Med Hyg*. 1993;49: 520–  
774 529.
- 775 63. Lee Y, Weakley AM, Nieman CC, Malvick J, Lanzaro GC. A multi-detection assay for  
776 malaria transmitting mosquitoes. *J Vis Exp*. 2015; e52385.
- 777 64. Bates D, Mächler M, Bolker B, Walker S. Fitting Linear Mixed-Effects Models using lme4  
778 [Internet]. *arXiv [stat.CO]*. 2014. Available: <http://arxiv.org/abs/1406.5823>
- 779 65. Hunt RH. A cytological technique for the study of *Anopheles gambiae* complex.  
780 *Parassitologia*. 1973;15: 137–139.
- 781 66. Bolger AM, Lohse M, Usadel B. Trimmomatic: a flexible trimmer for Illumina sequence data.  
782 *Bioinformatics*. 2014;30: 2114–2120.
- 783 67. Li H. Aligning sequence reads, clone sequences and assembly contigs with BWA-MEM.  
784 *arXiv.org*. Cornell University Library; 2013; Available: <http://arxiv.org/abs/1303.3997>
- 785 68. Fontaine MC, Pease JB, Steele A, Waterhouse RM, Neafsey DE, Sharakhov IV, et al.  
786 Mosquito genomics. Extensive introgression in a malaria vector species complex revealed  
787 by phylogenomics. *Science*. 2015;347: 1258524.
- 788 69. McKenna A, Hanna M, Banks E, Sivachenko A. The Genome Analysis Toolkit: a  
789 MapReduce framework for analyzing next-generation DNA sequencing data. *Genome*.  
790 2010; Available: <http://genome.cshlp.org/content/20/9/1297.short>
- 791 70. Yang J, Lee SH, Goddard ME, Visscher PM. GCTA: a tool for genome-wide complex trait  
792 analysis. *Am J Hum Genet*. 2011;88: 76–82.
- 793
